# Supplementary material for: High performance micro-flow cytometer based on optical fibres
Source: PubMed Central journal article supplement (PMC5514097; doi:10.1038/s41598-017-05843-7), 2017-07-17
Supplement: 41598_2017_5843_MOESM1_ESM.pdf [file 41598_2017_5843_MOESM1_ESM.pdf]

# High performance micro-flow cytometer based on optical fibres

S. Etcheverry<sup>1,2\*</sup>, A. Faridi,<sup>3</sup> H. Ramachandraiah,<sup>3</sup> T. Kumar<sup>3</sup>, W. Margulis,<sup>1,2</sup> F. Laurell,<sup>1</sup> and A. Russom<sup>3</sup>

<sup>1</sup>Department of Applied Physics, KTH Royal Institute of Technology, Stockholm, Sweden.

<sup>2</sup>Department of Fibre Optics, RISE Acreo AB, Stockholm, Sweden

<sup>3</sup>Division of Proteomics and Nanobiotechnology, Science for Life Laboratory, KTH Royal Institute of Technology, Solna, Sweden

## Supplementary note 1: Theoretical background for excitation and collection of light

The laser beam diverging from the core of the double-clad fiber (DCF) has a Gaussian intensity profile  $I(r,z)$  given by:

$$I(r, z) = \frac{2P}{\pi w(z)^2} \exp\left(\frac{-(2r)^2}{w(z)^2}\right) \quad (1)$$

where  $P$  is the total power and  $w(z)$  is the half width of the beam, which depends on the laser wavelength  $\lambda$ , the refractive index of the medium  $n$  and the core diameter  $d_{core}$ ,

$$w(z) = \frac{d_{core}}{2} \sqrt{1 + \left(\frac{4\lambda z}{d_{core}^2 n}\right)^2} \quad (2)$$

When the laser beam excites a fluorescent particle, a portion of the fluorescence is collected by the inner cladding of the double-clad fiber and is subsequently measured. The particle can be considered as a point-source located at  $(r,z)$  which emits light in all directions. The fraction of the light that reaches the inner cladding is defined by the solid angle<sup>1</sup>:

$$\Omega_f(r, z) = 2\pi \left( 1 - \cos \left[ \tan^{-1} \left( \frac{d_{clad}}{2z} \left( \cos \left( \tan^{-1} \left( \frac{r}{z} \right) \right) \right)^{\frac{3}{2}} \right) \right] \right) \quad (3)$$

where  $d_{clad}$  is the diameter of the DCF inner cladding. Additionally, the numerical aperture  $NA$  of an optical fiber defines an acceptance solid angle  $\Omega_{NA}$ ,

$$\Omega_{NA} = 2\pi \left( 1 - \cos \left( \sin^{-1} \frac{NA}{n} \right) \right) \quad (4)$$

Light entering the fiber at angles larger than  $\Omega_{NA}$  is not guided by total internal reflection and lost. The collection efficiency  $\eta(r, z)$  normalized to  $4\pi$  can be calculated as,

$$\eta(r, z) = \frac{\text{Min}(\Omega_f(r, z), \Omega_{NA}) A(r, z)}{4\pi} \quad (5)$$

where  $A(r, z)$  represents the fraction of the light encompassed by  $\Omega_{NA}$  that overlaps the DCF inner cladding<sup>1</sup>. The collection efficiency  $\eta(r, z)$  is constant and maximum for  $\Omega_{NA} > \Omega_f$  and decreases with  $z$  for  $\Omega_f > \Omega_{NA}$ .

### Supplementary figure 1

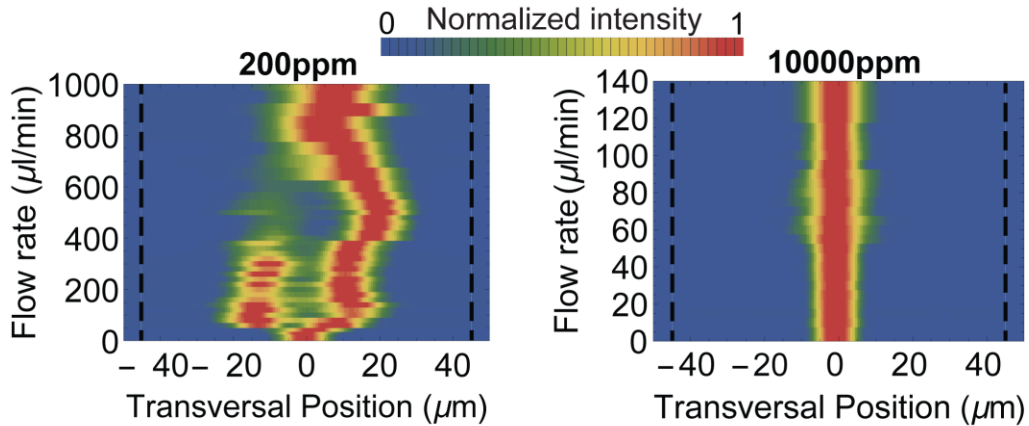

Elasto-inertial focusing of 15-μm particles flowing in a 90-μm capillary at different flow rates for PEO concentrations of 200 ppm and 10000 ppm. Dashed black lines define the capillary walls.

### Supplementary figure 2

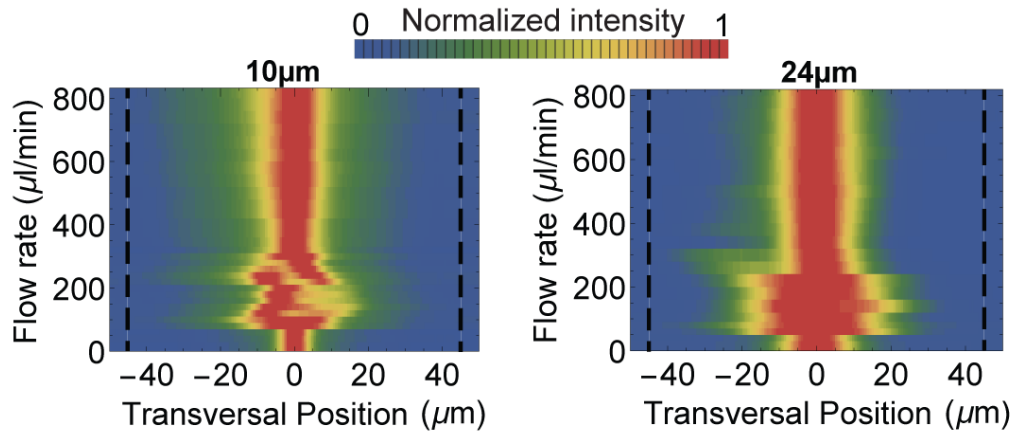

Elasto-inertial focusing of 10- $\mu\text{m}$  and 24- $\mu\text{m}$  particles flowing in a 90- $\mu\text{m}$  capillary at different flow rates/ for PEO concentration of 500 ppm . Dashed black lines define the capillary walls.

## References

1. Engelbrecht, C. J., Göbel, W. & Helmchen, F. Enhanced fluorescence signal in nonlinear microscopy through supplementary fiber-optic light collection. *Opt. Express* **17**, 6421–35 (2009).
